# Supplementary material for: Microplastic ingestion by commercial marine fish from the seawater of Northwest Peninsular Malaysia
Source: PeerJ. 2022 Apr 19;10:e13181. doi: 10.7717/peerj.13181 (PMC9029367; doi:10.7717/peerj.13181)
Supplement: Supplemental Information 1 [file peerj-10-13181-s001.xlsx]

## Sheet: Pelata
Species A- Pelata
Fish	Wet Weight (g)	Total length (cm)	Standard length (cm)	Gut weight (g)
1	38	16.5	12.6	1.1
2	42	16.6	13.1	1.3
3	46	17.1	13	1.4
4	32	15.7	12.1	1
5	44	16.2	12.6	1.6
6	42	16.7	13.3	1.6
7	41	16.8	12.9	2.07
8	32	16.1	12.2	1.84
9	37	16.6	12.5	1.73
10	47	17	13.7	1.55
11	37	17.1	13.9	1.31
12	29	15.9	12.7	1.29
13	38	17.1	12.9	1
14	42	16.6	13	2.74
15	43	16.8	13.1	1.9
16	47	17.5	14.2	1.51
17	44	17.1	13.1	1.52
18	42	16.8	13.5	2.05
SD	5.23843	0.467227	0.554718	0.432505
MEAN	40.1667	16.6778	13.0222	1.58389

## Sheet: Kedera
Species B- Kedera
Fish	Wet Weight (g)	Total length (cm)	Standard length (cm)	Gut weight (g)
1	48	17.5	14.8	1.77
2	45	17	14.3	1.92
3	43	16.3	13.6	2.45
4	43	16.2	14.1	2.02
5	41	17.2	14.5	3.99
6	52	18.1	15.1	3.57
7	42	16.2	13.8	2.25
8	50	17.6	14.8	2.41
9	43	16.5	13.9	2.26
10	48	16.8	14.3	3.1
11	54	18.1	15.4	3.62
12	51	17.4	14.9	2.19
13	46	16.8	13.8	2.51
14	46	16.1	14.1	3.04
15	42	16.4	14	1.86
16	44	18	14.3	2.48
17	44	17.2	14.5	2.52
18	40	16.4	13.6	2.75
SD	4.0293	0.681598	0.519678	0.63746
MEAN	45.6667	16.9889	14.3222	2.595

## Sheet: Tamban
Species C- Tamban
Fish	Wet Weight (g)	Total length (cm)	Standard length (cm)	Gut weight (g)
1	27	14.3	11.7	0.97
2	32	16.1	13.3	1.32
3	32	14.9	12.3	1.51
4	31	14.7	12.2	1.38
5	36	16	13.2	1.86
6	36	15.6	12.9	1.35
7	24	13.6	11.5	1.05
8	36	15.3	12.6	1.34
9	26	14	11.4	1.71
10	20	13.3	10.9	0.97
11	30	15.5	12.6	1.35
12	21	14.5	11.4	1.04
13	19	13.1	10.7	0.63
14	27	14.5	11.7	1.44
15	37	15.5	12.9	1.4
16	25	13.9	11.6	0.95
17	26	14.9	11.9	1.12
18	40	15.6	12.8	1.64
SD	6.26146	0.909518	0.779056	0.309506
MEAN	29.1667	14.7389	12.0889	1.27944

## Sheet: Kembong
Species D- Kembong
Fish	Wet Weight (g)	Total length (cm)	Standard length (cm)	Gut weight (g)
1	44	16.7	13.5	2.87
2	45	16.1	13.4	2.85
3	45	15.9	12.7	3.16
4	43	15.7	13.3	3.37
5	47	15.8	13	2.99
6	40	16	13.2	2.6
7	45	16.6	13.4	3.09
8	49	18	14.1	3.13
9	41	16.3	13.1	2.44
10	42	15.7	13	2.62
11	45	16.6	13.6	2.7
12	38	15.7	12.9	2.34
13	46	16.3	13.3	2.57
14	44	16.7	13.8	2.91
15	40	16.3	13.2	2.71
16	40	16.4	13.4	4.02
17	47	16.1	13.5	4.4
18	44	16.5	13.5	2.24
SD	2.93336	0.547723	0.332204	0.551535
MEAN	43.6111	16.3	13.3278	2.945
